# Supplementary material for: RNA-Seq reveals new DELLA targets and regulation in transgenic GA-insensitive grapevines
Source: BMC Plant Biol. 2019 Feb 18;19:80. doi: 10.1186/s12870-019-1675-4 (PMC6379989; doi:10.1186/s12870-019-1675-4)
Supplement: Supplementary file 2 — Table S2. A summary of the uniquely induced and suppressed genes (XLSX 11 kb) [file 12870_2019_1675_MOESM2_ESM.xlsx]

## Sheet: Table S2
Table S2 A summary of the uniquely induced and suppressed genes
Grapevine gene ID	A thaliana ID	Common gene name	Tissue	Expression status relative to WT	Average expression in five transgenic lines (CPM)	Average expression in WT (CPM)	Annotation
GSVIVG01011936001	AT1G68660	CLPS1	Shoot	Induced	3.4	<< 1	Ribosomal protein L12/ ATP-dependent Clp protease adaptor protein clps family protein
GSVIVG01024999001	AT3G46460	UBC13	Shoot	Induced	2.4	<< 1	Ubiquitin-conjugating enzyme 13
GSVIVG01038702001	AT2G46495	--	Shoot	Induced	2.2	<< 1	RING/U-box superfamily protein
GSVIVG01037349001	AT2G45220	PME17	Leaf	Induced	90.7	<< 1	Plant invertase/pectin methylesterase inhibitor superfamily
GSVIVG01009886001	--	--	Leaf	Induced	1.6	<< 1	Uncharacterized protein
GSVIVG01021110001	AT1G28410	--	Leaf	Induced	1.5	<< 1	Myosin heavy chain-like protein
GSVIVG01009461001	AT1G49760	PAB8	Leaf	Induced	1.4	<< 1	Poly(A) binding protein 8
GSVIVG01009317001	AT1G58420	--	Leaf	Induced	1.4	<< 1	Uncharacterised conserved protein UCP031279
GSVIVG01028671001	AT4G13150	--	Leaf	Induced	1.3	<< 1	Pthr30353 - inner membrane protein deda-related
GSVIVG01029837001	--	--	Leaf	Induced	1.3	<< 1	Uncharacterized protein
GSVIVG01009274001	AT4G37790	HAT22	Leaf	Suppressed	<< 1	1.5	Homeobox-leucine zipper protein family
GSVIVG01037038001	AT2G16270	--	Leaf	Suppressed	<< 1	1.4	Transmembrane protein
GSVIVG01015852001	AT1G05310	--	Root	Induced	1.3	<< 1	Pectin lyase-like superfamily protein
GSVIVG01004123001	AT4G29090	--	Root	Induced	1.3	<< 1	Ribonuclease H-like superfamily protein
GSVIVG01011850001	AT1G25390	--	Root	Induced	1.4	<<1	Protein kinase superfamily protein
GSVIVG01009911001	--	--	Root	Induced	1.6	<<1	Uncharacterized protein
GSVIVG01011300001	AT2G22540	VvSVP	Root	Suppressed	<< 1	11.4	K-box region and MADS-box transcription factor family protein
GSVIVG01024502001	AT4G33550	--	Root	Suppressed	<< 1	3.3	Bifunctional inhibitor/ seed storage 2S albumin superfamily protein
GSVIVG01016932001	AT1G51920	--	Root	Suppressed	<< 1	2.6	Cryptdin protein-like
GSVIVG01009541001	AT4G37070	AtPLAIVA	Root	Suppressed	<< 1	2.1	Acyl transferase/acyl hydrolase/lysophospholipase superfamily protein
GSVIVG01018002001	AT3G22560	--	Root	Suppressed	<< 1	1.9	Acyl-coa N-acyltransferases (NAT) superfamily protein
GSVIVG01005846001	AT5G54370	--	Root	Suppressed	<< 1	1.8	Late embryogenesis abundant-related protein
GSVIVG01025958001	AT5G17680	--	Root	Suppressed	<< 1	1.4	Disease resistance protein (TIR-NBS-LRR class), putative
GSVIVG01006118001	AT1G11330	--	Root	Suppressed	<< 1	1.3	S-locus lectin protein kinase family protein
GSVIVG01000571001	--	--	Root	Suppressed	<< 1	1.3	Uncharacterized protein
GSVIVG01031706001	--	--	Root	Suppressed	<< 1	1.3	Uncharacterized protein
GSVIVG01013855001	--	--	Root	Suppressed	<< 1	1.3	Uncharacterized protein
